Anesthesiology  
68:316, 1988

## Use of a Nerve Stimulator for Peripheral Nerve Blocks. II.

*To the Editor:*—I believe that Goldberg *et al.*<sup>1</sup> have missed the point on the use of electrical stimulation in regional anesthesia.

The nerve stimulator should be approached as an ancillary tool to place the tip of the inserting needle in contact with the nerve(s) to be bathed with the local anesthetic. This maneuver eliminates inadequate placement as the cause of block failure. It does not eliminate choosing the wrong nerve(s) or segment (poor anatomical knowledge), or the wrong anesthetic drug, concentration, and/or volume as the causes of block failure. To correctly use electrolocation in regional anesthesia, you should use an instrument made with the correct electrophysiological principles and capable of reading the stimulating current in each pulse within 0.01 of a milliamp accuracy. With the use of "any" stimulator,

you will find, as you already did, that there is no difference with the "blind techniques." The type of stimulator that "dials current" uses the wrong approach to the technique of electrical location of nerves in regional anesthesia.

ANIBAL GALINDO, M.D., PH.D.  
*Cedars Medical Center  
Miami, Florida*

### REFERENCE

1. Goldberg ME, Gregg C, Larijani GE, Norris MC, Marr AT, Seltzer JL: A comparison of three methods of axillary approach to brachial plexus blockade for upper extremity surgery. *ANESTHESIOLOGY* 66:814-816, 1987

(Accepted for publication November 2, 1987.)

Anesthesiology  
68:316-317, 1988

*In Reply:*—We would like to thank Drs. Galindo, Forte, and Lee for their constructive comments concerning our study of brachial plexus blockade. We feel, however, that a reply to certain points is in order.

The purpose of our study was to compare the results obtained with three different techniques of axillary blockade in a resident training program. Dr. Forte and colleagues are obviously experienced anesthesiologists, and we would assume that, as the level of experience increases, so would the success rate with nerve stimulators. Forte and Lee's retrospective review of results obtained with supplemented blocks in sedated patients cannot be compared to our prospective, blinded, randomized study of unsupplemented blocks in minimally sedated patients.<sup>1</sup>

We thank Dr. Galindo for his suggestions regarding use of nerve stimulators. The stimulator used throughout our study (Neuro-Trace®, HDC Corp, Mountain View, CA) is designed specifically for electrolocation. The battery lasts 400 use hours, and is sealed in plastic to eliminate current leak. Output varies between 0.4 and 3 mA released as a 100  $\mu$ sec rectangular pulse every second. The unit has a high internal resistance (330 K  $\Omega$ ) to minimize current fluctuations in response to variations in tissue resistance. In addition, we used the stimu-

lator in the manner suggested by Pither *et al.*\* We advanced the needle toward the nerve until muscle twitch occurred with a current below 1 mA. Subsequently, we confirmed correct electrolocation by noting the elimination of twitch response following injection of a small amount of local anesthetic.

In summary, we hold to our findings that, in the situation described, the nerve stimulator was no better than other techniques for achieving successful axillary blockade.

MICHAEL E. GOLDBERG, M.D.  
*Assistant Professor of Anesthesiology*

MARK C. NORRIS, M.D.  
*Assistant Professor of Anesthesiology*

*Department of Anesthesiology  
Jefferson Medical College  
Philadelphia, Pennsylvania 19107*

\* Pither CE, Raj PP, Ford DJ: The use of peripheral nerve stimulators for regional anesthesia: A review of experimental characteristics, techniques and clinical applications. *Reg Anesth* 10:49-58, 1985
